# Supplementary material for: Urine Cellular DNA Point Mutation and Methylation for Identifying Upper Tract Urinary Carcinoma
Source: MDPI journal article supplement (doi:10.3390/cancers14143537), 2022-07-21
Supplement: s1 [file s1]

**Supplementary Table S1.** The protocol of *FGFR3* and *TERT* mutation PCR reaction system.

|                                     |             |
|-------------------------------------|-------------|
| DNA                                 | 50 ng       |
| T228-F (20uM)                       | 1 µL        |
| T228-R (20uM)                       | 1 µL        |
| T228-FAM-MGB (10uM)                 | 1 µL        |
| F746-F (20uM)                       | 1 µL        |
| F746-R (20uM)                       | 1 µL        |
| F746-FAM-MGB (10uM)                 | 1 µL        |
| GAPDH-F (10uM)                      | 0.5 µL      |
| GAPDH-R (10uM)                      | 0.5 µL      |
| GAPDH-VIC-MGB (10uM)                | 0.5 µL      |
| 50×ROX Reference Dye                | 1 µL        |
| 2×AmpliTaq Gold™ 360 PCR Master Mix | 25 µL       |
| NF-H <sub>2</sub> O                 | Add to 50µL |

**Supplementary Table S2.** Primers for real-time quantitative PCR analysis.

| Primer name | Primer sequence (5'-3')                |
|-------------|----------------------------------------|
| NRN1-F      | AGATGTGTATAAGAGACAGTTGTAGGAAGAGCGAGGC  |
| NRN1-R      | AGATGTGTATAAGAGACAGTTACGTATCTACCCCAACG |

**Supplementary Table S3.** The protocol of *NRN1* methylation PCR reaction system.

|                                     |             |
|-------------------------------------|-------------|
| DNA                                 | 100 ng      |
| 676-bis-F4 (20uM)                   | 2 µL        |
| 676-bis-R3 (20uM)                   | 2 µL        |
| 676- bis-FAM 2-MGB (10uM)           | 1 µL        |
| ACTB-bis-F2 (10uM)                  | 0.5 µL      |
| ACTBis-R3 (10uM)                    | 0.5 µL      |
| ACTB-bis-VIC-MGB (10uM)             | 0.5 µL      |
| 50×ROX Reference Dye                | 1 µL        |
| 2×AmpliTaq Gold™ 360 PCR Master Mix | 25 µL       |
| NF-H <sub>2</sub> O                 | Add to 50µL |

**Supplementary Table S4.** The program of qPCR reaction.

| Number | Step                                                          | Temperature | Time  | Cycles |
|--------|---------------------------------------------------------------|-------------|-------|--------|
| 1      | Pre-denaturation                                              | 95°C        | 10min | 1      |
| 2.1    | Denaturation                                                  | 95°C        | 15s   | 15     |
| 2.2    | Annealing                                                     | 59°C        | 45s   |        |
| 2.3    | Extension                                                     | 72°C        | 1min  |        |
| 3.1    | Denaturation                                                  | 95°C        | 15s   | 35     |
| 3.2    | Annealing                                                     | 55°C        | 45s   |        |
| 3.3    | Extension,<br>Fluorescence signal<br>(FAM/VIC)<br>acquisition | 72°C        | 1min  |        |
| 4      | Instrument<br>cooling                                         | 40°C        | 5min  | 1      |

**Supplementary Table S5.** Results of stage and grade specific analyses.

|                    | <b>Ta-2</b> | <b>T3-4</b> | <b>P value</b> | <b>Low-grade</b> | <b>High-grade</b> | <b>P value</b> |
|--------------------|-------------|-------------|----------------|------------------|-------------------|----------------|
| <b>Methylation</b> |             |             |                |                  |                   |                |
| negative           | 7           | 1           | 0.428          | 1                | 6                 | 1.000          |
| positive           | 57          | 28          |                | 17               | 69                |                |
| <b>Mutation</b>    |             |             |                |                  |                   |                |
| negative           | 42          | 20          | 0.752          | 11               | 51                | 0.629          |
| positive           | 22          | 9           |                | 7                | 25                |                |

**Supplementary Table S6.** Univariable logistic regression analysis.

| <b>Variables</b>        | <b>OR</b> | <b>95% CI</b>  | <b>P value</b>   |
|-------------------------|-----------|----------------|------------------|
| <b>Gender</b>           |           |                |                  |
| male                    | 1.443     | 0.81-2.56      | 0.211            |
| <b>Age</b>              | 1.06      | 1.03-1.08      | <b>&lt;0.001</b> |
| <b>Mutations</b>        |           |                |                  |
| ≥1 gene mutated         | 15.87     | 7.41-33.33     | <b>&lt;0.001</b> |
| <b>Methylation</b>      |           |                |                  |
| NRN1( $\Delta$ Ct<6.39) | 200.00    | 83.33-500.00   | <b>&lt;0.001</b> |
| <b>Panel</b>            | 825.19    | 262.90-2590.10 | <b>&lt;0.001</b> |

OR: odds ratio

**Supplementary Table S7.** Multivariate logistic regression analysis.

| <b>Variables</b>        | <b>OR</b> | <b>95% CI</b> | <b>P value</b>   |
|-------------------------|-----------|---------------|------------------|
| <b>Age</b>              | 1.01      | 0.97-1.05     | 0.539            |
| <b>Mutations</b>        |           |               |                  |
| ≥1 gene mutated         | 9.35      | 2.35-37.04    | <b>0.002</b>     |
| <b>Methylation</b>      |           |               |                  |
| NRN1( $\Delta$ Ct<6.39) | 166.67    | 62.50-500.00  | <b>&lt;0.001</b> |

OR: odds ratio
